# Supplementary material for: Secukinumab is Superior to Ustekinumab in Clearing Skin in Patients with Moderate to Severe Plaque Psoriasis (16-Week CLARITY Results)
Source: Springer Nature journal article supplement (doi:10.1007/s13555-018-0265-y), 2018-10-17
Supplement: MOESM1 [file 16206778]

Supplementary Table 1. Key exclusion criteria

1. Forms of psoriasis other than plaque psoriasis
2. Drug-induced psoriasis
3. Ongoing use of prohibited treatments
4. Previous exposure to secukinumab or any other biologic drug directly targeting IL-17A or IL-17RA, or ustekinumab, or any therapies targeting IL-12 or IL-23
5. Use of any other investigational drugs within 5 half-lives of the investigational treatment before study drug initiation
6. Pregnant or nursing (lactating) women

IL, interleukin
